# Supplementary material
Source: Springer Nature journal article supplement (https://www.springermedizin.de/resource/supplementary/13024_2014_560_MOESM3_ESM.pdf/9644392)

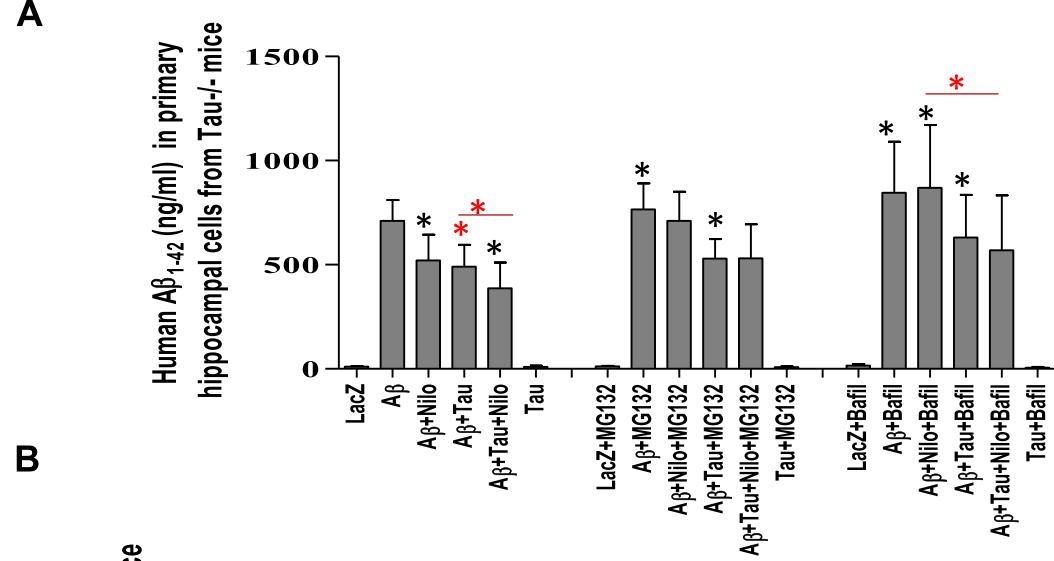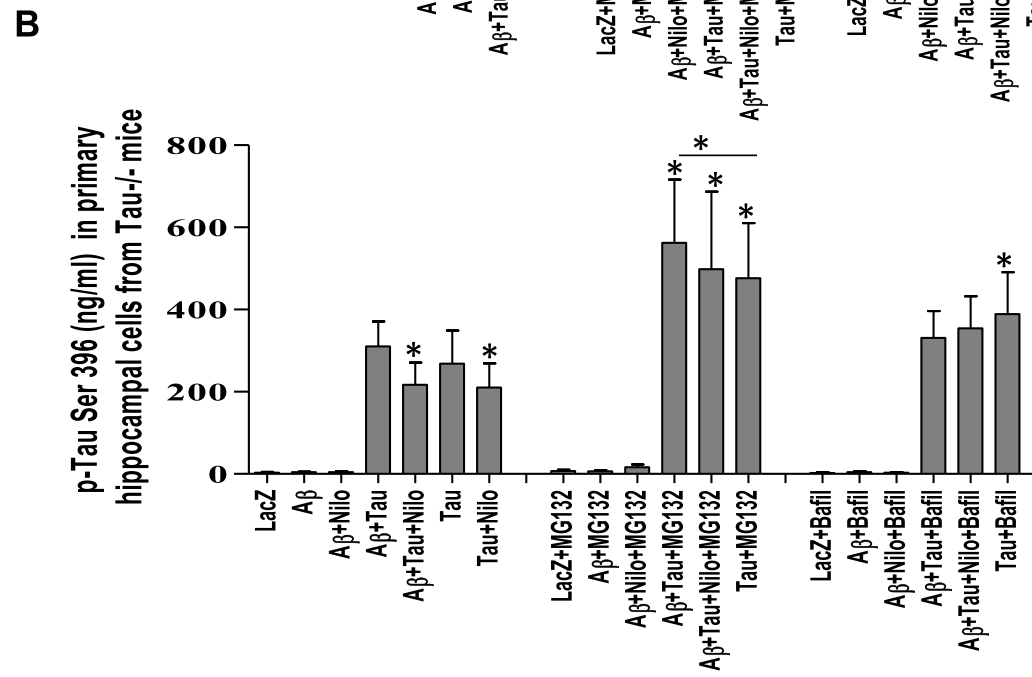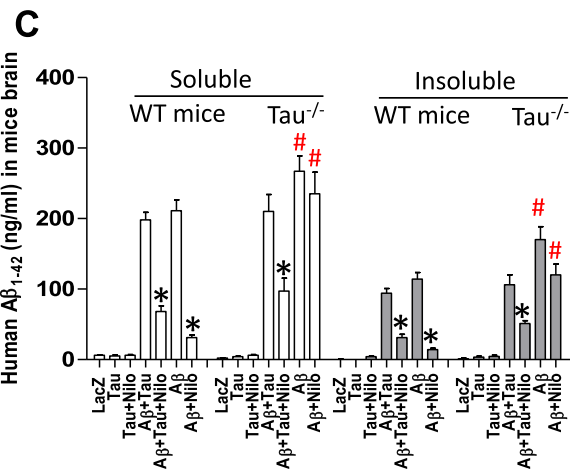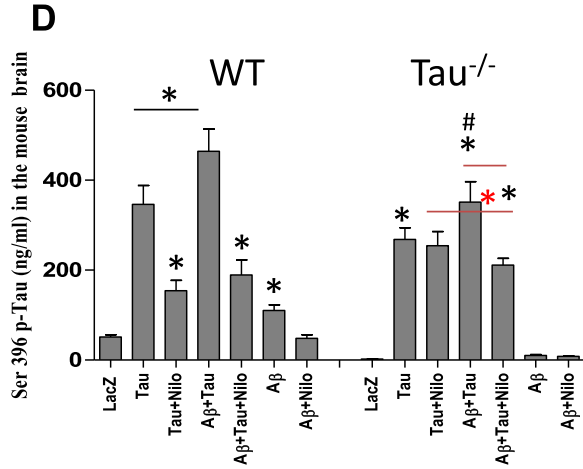

Supplement: MOESM3 [file 9644392]
